# Supplementary material for: Antigen down format photoelectrochemical analysis supported by fullerene functionalized Sn3O4
Source: Royal Society of Chemistry journal article supplement (doi:10.1039/d0cc02933e), 2020-01-01
Supplement: d0cc02933e1.pdf [file d0cc02933e1.pdf]

## Electronic Supplementary Information

### EXPERIMENTAL SECTION

#### Chemicals and materials

The ITO conductive electrode was gained from Zhuhai Kaivo Electronic Components Co. Ltd., China. PCT antigen (Ag), antibody (Ab) and bovine serum albumin (BSA) were purchased from Shanghai Aladdin Biochemical Technology Co. Ltd., (Shanghai, China). Stannous chloride ( $\text{SnCl}_2 \cdot 2\text{H}_2\text{O}$ ), trisodium citrate ( $\text{Na}_3\text{C}_6\text{H}_5\text{O}_7 \cdot 2\text{H}_2\text{O}$ ), mercaptoacetic acid, ferrous sulfate ( $\text{FeSO}_4 \cdot 7\text{H}_2\text{O}$ ) were purchased from Tianjin Kermel Chemical Co. Ltd., (Tianjin, China). Polyvinyl pyrrolidone, Cadmium chloride ( $\text{CdCl}_2 \cdot 2\text{H}_2\text{O}$ ), fullerene, sulfur and selenium powder were obtained from Sinopharm Chemical Reagent Co.Ltd., (Shanghai, China). All other reagents were of analytical grade and ultrapure water was used throughout the study.

#### Apparatus

All photoelectrochemical measurements were performed with an electrochemical workstation (Zahner Zennium PP211, Germany). The surface morphology of the sample was obtained from scanning electron microscopy (SEM, S-3400). Transmission electron micrographs (TEM) were measured on an H-800 microscope (Hitachi, Japan). X-ray photoelectron spectra (XPS) were elucidated using an ESCALAB 250 electron energy spectrometer (Thermo Fisher Scientific, USA) and the X-ray excitation source was monochromated Al Ka 150 W. UV-vis spectra were obtained on a Shimadzu UV-3101PC spectrometer (Japan). X-ray diffraction (XRD) patterns were obtained by using D8 focus diffractometer (Bruker AXS, Germany).

#### *Preparation of flower-like $\text{Sn}_3\text{O}_4$*

The preparation of  $\text{Sn}_3\text{O}_4$  was carried out according to the previous reported method with some modifications.<sup>1</sup> Firstly, 5 mmol of  $\text{SnCl}_2 \cdot 2\text{H}_2\text{O}$  (1.1282 g) and 12 mmol of trisodium citrate ( $\text{Na}_3\text{C}_6\text{H}_5\text{O}_7 \cdot 2\text{H}_2\text{O}$ , 3.5393 g) was co-dissolved into 12.5 mL of ultrapure water, the mixture was allowed stirring under room temperature, and the well-mixed solution as solution A. In the meantime, 0.3 g of NaOH was dissolved into 12.5 mL of ultrapure, and as solution B. Secondly, these two homogeneous solutions were mixed, and continued stirring for another 24 h at room atmosphere. After that, the mixture was transferred to a 50 mL Teflon-lined autoclave and maintained 180 °C for 12 h. Finally, the yellow product was washed with ultrapure water for 5 times, then dried at 60 °C.

### ***Synthesis of $\text{FeS}_2$ nanoparticles***

The synthesis of  $\text{FeS}_2$  was processed via a hydrothermal method.<sup>2</sup> Briefly, 0.5881 g of  $\text{Na}_3\text{C}_6\text{H}_5\text{O}_7 \cdot 2\text{H}_2\text{O}$  and 0.5000 g of polyvinyl pyrrolidone (PVP, K-24) were dispersed in 60 mL of ultrapure water under tempestuously stirring to form a pellucid solution. Then, 1.3911 g of  $\text{FeSO}_4 \cdot 7\text{H}_2\text{O}$  was added into the solution, and made continues stirring for another 30 min. After that, 10 mL of NaOH (1.5 M) solution was added into the above solution drop by drop, followed by adding 0.4801 g of sulfur powder into the solution, and the mixture was allowed to stirring persistently until a homogeneous solution obtained. Then, the mixture was transferred in to a 100 mL Teflon-lined autoclave, maintaining 180 °C for 24 h. After the reaction, the product was washed with ultrapure water and ethanol, finally, dried at 60 °C.

### ***Synthesis of $\text{C}_{60}$ QDs***

The synthesis of C<sub>60</sub> QDs was according to a previous report with some modified.<sup>3</sup> First, 5 mg of fullerene particles was added into 5 mL of toluene with violent stirring to obtain a purple homogeneous solution. Then, 5 mL of ultrapure water was added into the above solution and the resulted mixture was treated ultrasonically for about 24 h to thoroughly get rid of the toluene. Ultimately, the obtained buff fullerene dispersion was kept for further use.

### ***Synthesis of CdSe nanoparticles***

The preparation of CdSe was carried out through a previous reported method.<sup>4</sup> Firstly, the precursor NaHSe was prepared as follow: 0.0395 g of Se powder, and 0.0400g of NaBH<sub>4</sub> were dissolved in 2 mL ultrapure water under stirring until the mixture solution turned transparent. At the same time, 0.0384 g of CdCl<sub>2</sub>·2H<sub>2</sub>O was dissolved in 80 mL of ultrapure water, and 250 μL mercaptoacetic acid was added in the solution, the pH was adjusted to 9.0 by NaOH (1.0 M). Then, the as-prepared NaHSe solution was added into the above solution, and the mixture was stirred for another 2 h at room temperature. Finally, the product was purified by centrifugation with ethanol and dried.

### ***Preparation of FeS<sub>2</sub>-Ab<sub>2</sub> bioconjugates***

3 mg of prepared FeS<sub>2</sub> was dispersed in 1 mL of PBS buffer solution (pH 7.4, 0.1 M), then, 20 μL of mixed crosslinking agent (5mg/mL of EDC and 1mg/mL of NHS) was added, and activated for 0.5 h at 37 °C. After that, 200 μL of Ab<sub>2</sub> (1 μg/mL) was added into the above solution, and incubated gently at 37 °C for 5 h. Finally, the mixture was centrifuged and washed with PBS (pH 7.4, 0.1 M), and as well dispersed

into 1 mL PBS buffer solution stored at 4 °C for later use.

### ***The assembly of PEC sensor***

For better detection, the ITO conductive electrode was first cut into suitable size (2 cm×0.8 cm), and been ultrasonic cleaning with acetone, ethanol, ultrapure water in turn. For modification, 10 μL of photosensitive materials of Sn<sub>3</sub>O<sub>4</sub> (5 mg/mL), C<sub>60</sub> QDs, and CdSe (5 mg/mL) were dropped onto the electrode successively, after dried naturally at room temperature, 6 μL of mixture (20 mg/mL of EDC and 10 mg/mL of NHS) and 4 μL of standard PCT antigen was decorated on to the photoactive electrode, the electrode was incubated for 1 h. After washed the dried electrode, and blocked the non-specific sites with BSA (1%), the electrode was incubated with 6 μL mixture (1 μg/mL of Ab<sub>1</sub> and various concentration of target PCT) for 40 min at room temperature. Finally, 6 μL of FeS<sub>2</sub>-Ab<sub>2</sub> was modified onto the electrode and allowed naturally dried for PEC measurement.

### ***PEC measurements***

The finished PEC electrode as work electrode was dipped into 10 mL of PBS buffer solution containing with 0.1 M of ascorbic acid (AA), performing on an photoelectrochemical workstation and adopted three-electrode configuration (saturated calomel electrode (SCE) for reference, platinum electrode for counter) for measuring the PEC response through standardized recycling method, and the 100 W LED lamp (white light, 400-700 nm) is used as the stimulation resource.

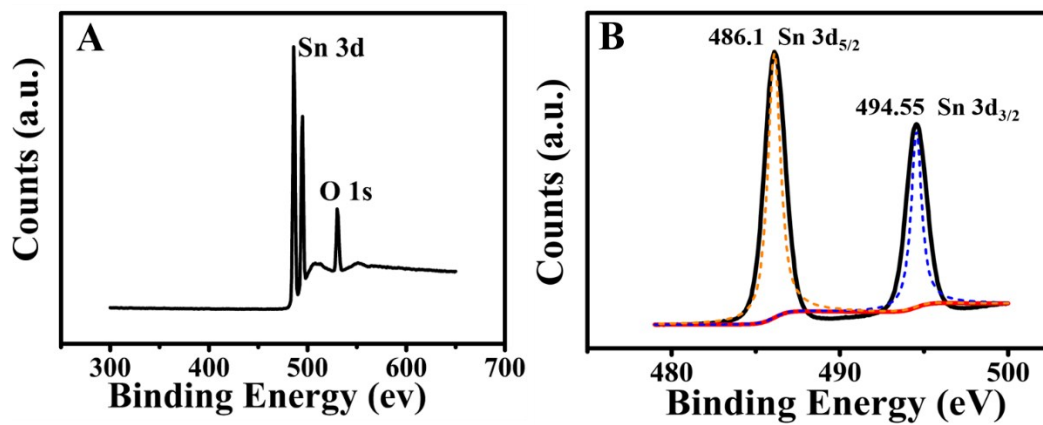

Figure S1. The XPS peak of (A) Sn<sub>3</sub>O<sub>4</sub> and (B) Sn element.

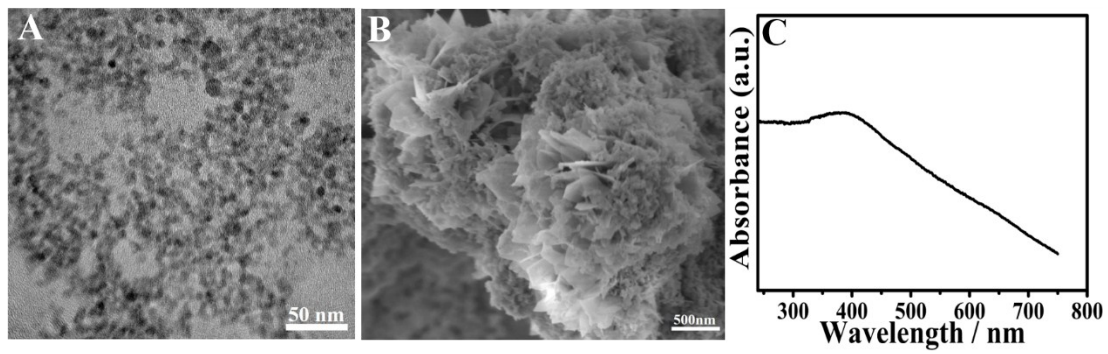

Figure S2. The TEM image of CdSe (A), the SEM image of Sn<sub>3</sub>O<sub>4</sub>/C<sub>60</sub>/CdSe (B), and the UV-Vis absorption spectrum of FeS<sub>2</sub> nanoparticles.

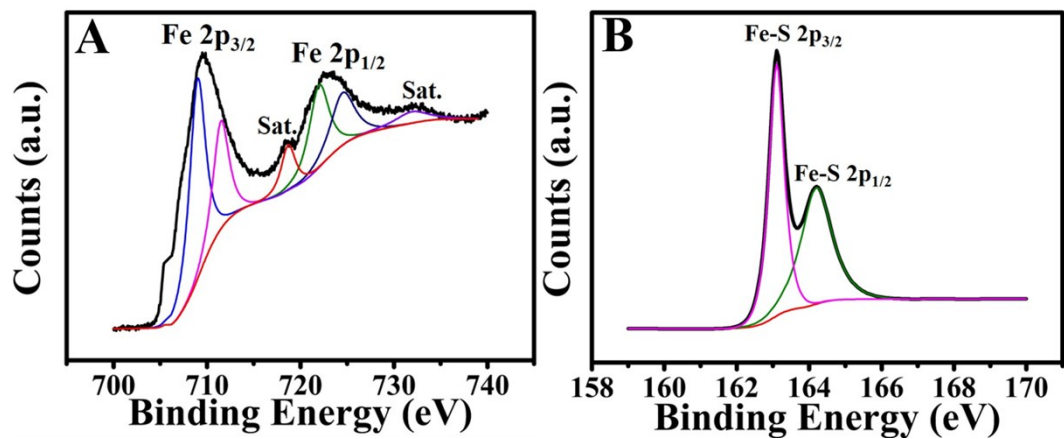

Figure S3. The XPS peaks of (A) Fe element and (B) S element of FeS<sub>2</sub> nanoparticles.

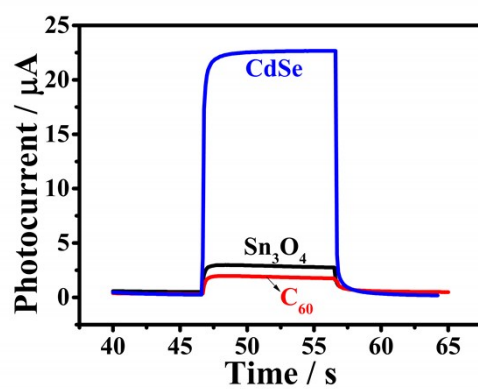

Figure S4. The photocurrent of pure Sn<sub>3</sub>O<sub>4</sub>, pure C<sub>60</sub>, and pure CdSe.



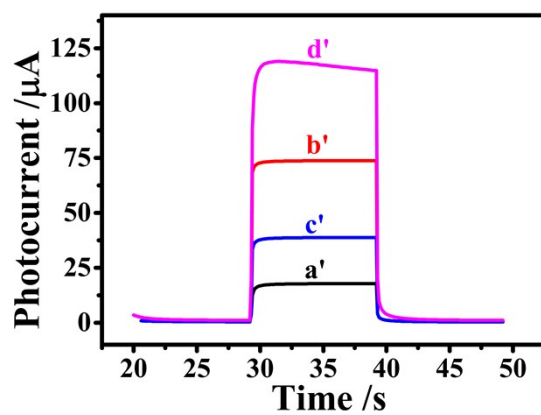

**Figure S5.** The comparison of PEC response for different electrode. (a')  $\text{Sn}_3\text{O}_4/\text{C}_{60}$ , (b')  $\text{Sn}_3\text{O}_4/\text{CdSe}$ , (c')  $\text{C}_{60}/\text{CdSe}$ , and (d')  $\text{Sn}_3\text{O}_4/\text{C}_{60}/\text{CdSe}$ .

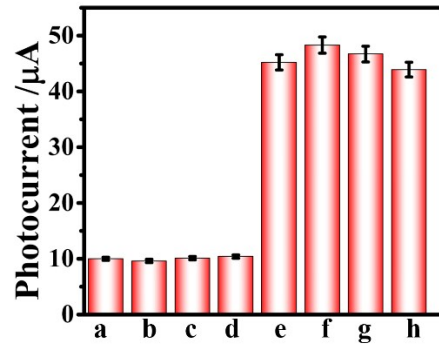

**Figure S6.** The selectivity of the sensor. Photocurrents response of ITO/Sn<sub>3</sub>O<sub>4</sub>/C<sub>60</sub>/CdSe/EDC-NHS/Ag/BSA/(Ab<sub>1</sub>+target Ag)/Ab<sub>2</sub>-FeS<sub>2</sub> to the interfering substances (0.5 ng/mL) exist alone and coexistence with PCT (0.005 ng/mL): (a) Blank, (b) blank+ A $\beta$ , (c) blank+ BNP, (d) blank+ PSA, (e) PCT, (f) PCT+ A $\beta$ , (g) PCT+ BNP, (h) PCT+PSA.

**Table S1.** The developed PEC sensors for detecting procalcitonin compared to other published immunosensor.

| Method                             | Linear range<br>(ng/mL) | Detection limit<br>(fg/mL) | Reference                 |
|------------------------------------|-------------------------|----------------------------|---------------------------|
| Electrochemical sensor             | 0.0018 - 500            | 360                        | Shen et al. <sup>5</sup>  |
| Electrochemical sensor             | 0.001-20                | 430                        | Liu et al. <sup>6</sup>   |
| Electrochemiluminescence<br>sensor | 0.1-50                  | 41                         | Yang et al. <sup>7</sup>  |
| Chemiluminescence sensor           | 0.0025-80               | 500                        | Nie et al. <sup>8</sup>   |
| Photoelectrochemical sensor        | 0.05-100                | 17.3                       | Feng et al. <sup>9</sup>  |
| Fluorescence sensor                | 0.1-10                  | 250000                     | Zhou et al. <sup>10</sup> |
| This work                          | 0.00001-10              | 3.5                        | This work                 |

**Table S2.** Recovery results of PCT in human serum samples detected by the proposed PEC sensor (n=5)

| sample<br>(ng/mL) | Target added<br>(ng/mL) | Average<br>(ng/mL) | RSD<br>(%) | Recovery<br>(%) |
|-------------------|-------------------------|--------------------|------------|-----------------|
|                   | 0.005                   | 0.5652             | 2.67       | 104             |
| 0.56              | 0.5                     | 1.073              | 3.49       | 102.6           |
|                   | 5.00                    | 5.501              | 4.01       | 98.82           |

## Reference

1. C. M. Li, S. Y. Yu, H. J. Dong, C. B. Liu, H. J. Wu, H. N. Che and G. Chen, *Appl. Catal. B-Environ.*, 2018, **238**, 284-293.
2. Y. Y. Li, Q. Xiao and S. P. Huang, *Mater. Chem. Phys.*, 2017, **193**, 311-315.
3. H. H. Wang, M. J. Li, H. J. Wang, Y. Q. Chai and R. Yuan, *ACS Appl. Mater. Interfaces*, 2019, **11**, 23765-23772.
4. F. Gao, S. Ma, X. Xiao, Y. Hu, D. Zhao and Z. He, *Talanta*, 2017, **163**, 102-110.
5. W. J. Shen, Y. Zhuo, Y. Q. Chai, Z. H. Yang, J. Han and R. Yuan, *ACS Appl. Mater. Interfaces*, 2015, **7**, 4127-4134.
6. F. Liu, G. Xiang, R. Yuan, X. Chen, F. Luo, D. Jiang, S. Huang, Y. Li and X. Pu, *Biosens. Bioelectron.*, 2014, **60**, 210-217.
7. L. Yang, D. Fan, Y. Zhang, C. Ding, D. Wu, Q. Wei and H. Ju, *Anal. Chem.*, 2019, **91**, 7145-7152.
8. R. Nie, X. Xu, X. Cui, Y. Chen and L. Yang, *ACS Omega*, 2019, **4**, 6210-6217.
9. J. Feng, F. Li, L. Liu, X. Liu, Y. Qian, X. Ren, X. Wang and Q. Wei, *Sens. Actuators, B-Chem.*, 2020, **308**, 127685.
10. Y. Zhou, X. M. Shao, Y. W. Han and H. M. Zhang, *Anal. Methods*, 2018, **10**, 1015-1022.
